# Supplementary material for: From sea-urchins to starfishes: controlling the adsorption of star-branched polyelectrolytes on charged walls
Source: Royal Society of Chemistry journal article supplement (doi:10.1039/b708788h), 2007-01-01
Supplement: b708788h.pdf [file b708788h.pdf]

**Supplementary material on the article:**

**From sea-urchins to starfishes: controlling the adsorption of  
star-branched polyelectrolytes on charged walls**

Martin Konieczny\* and Christos N. Likos<sup>†</sup>

*Institut für Theoretische Physik II: Weiche Materie,*

*Heinrich-Heine-Universität Düsseldorf,*

*Universitätsstraße 1, D-40225 Düsseldorf, Germany*

As we are dealing with macromolecules with a *finite* number of degrees of freedom, the changes between states are not phase transitions but rather smooth crossovers. Nevertheless, an order parameter allowing an assignment of a phase to each orientational diagram can be defined. The set of points  $y \equiv \langle \cos \theta_i \rangle$  seen as a function of  $x \equiv i/(f-1)$  can be fitted for all states by a family of functions  $h(x; x_0, y_0)$  of the form

$$h(x; x_0, y_0) = \begin{cases} (y_0 - 1) \frac{x}{x_0} + 1 & \text{for } 0 \leq x \leq x_0; \\ y_0 & \text{for } x_0 < x \leq 1, \end{cases}$$

with  $x_0$  and  $y_0$  being fit parameters (see inset of Fig. 1). These serve to define the two-dimensional order parameter  $O = (O_1, O_2)$  as  $O_1 = |y_0 - R_d/R_s|$  and  $O_2 = 2x_0/(1 - y_0)$ .  $O_1$  is a measure of the distance of the star centre from the surface and  $O_2$  of the sphericity of the nonadsorbed chains. The ideal values of  $O$  read as  $(1, 1)$  for the sea-urchin,  $(\beta, 1)$  for the jellyfish,  $(0, 1)$  for the anemone,  $(0, \gamma)$  for the antenna and  $(0, 0)$  for the starfish, with  $0 < \beta, \gamma < 1$ .

The main plot of Fig. 1 shows the values  $(O_1, O_2)$  obtained for all parameters in the simulations of systems I and II. All data points follow, within small margins, a  $\Gamma$ -shaped line  $(O_1 \cong 0, 0 \leq O_2 \leq 1) \cup (0 \leq O_1 \leq 1, O_2 \cong 1)$ . In the absence of a horizontal segment of the  $\langle \cos \theta_i \rangle$ -curves, we characterise the shape as spherical, since there is very weak adsorption of a few chains only. This explains the extension of the ‘sea-urchin’-symbols in Fig. 1 to values  $O_1 < 1$ .

---

\* Electronic address: [kon@thphy.uni-duesseldorf.de](mailto:kon@thphy.uni-duesseldorf.de)

† Electronic address: [likos@thphy.uni-duesseldorf.de](mailto:likos@thphy.uni-duesseldorf.de)

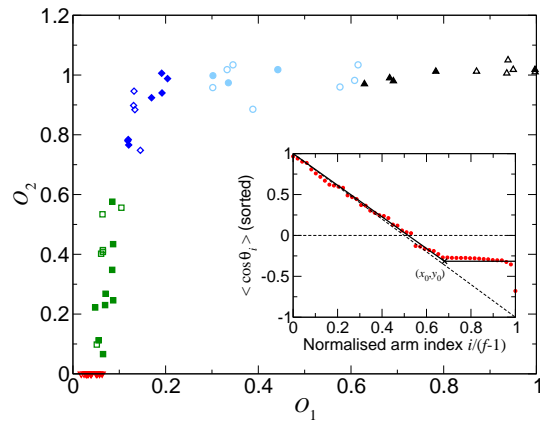

FIG. 1: Characterisation of the five shapes found, according to the value of the two-dimensional parameter defined in the text. Open symbols refer to system I and closed ones to system II. The symbols are colour-coded as in Fig. 3 of the main article. Black triangles up: sea-urchin; light blue circles: jellyfish; dark blue diamonds: anemone; green squares: antenna; red triangles down: starfish. The inset indicates the underlying procedure for the calculation of the order parameter.
